# Supplementary material for: A titanium dioxide nanoparticle sandwiched separator for Na–O2 batteries with suppressed dendrites and extended cycle life
Source: Royal Society of Chemistry journal article supplement (doi:10.1039/c8cc00993g), 2018-01-01
Supplement: c8cc00993g1.pdf [file c8cc00993g1.pdf]

***Supporting Information (SI)***

Titanium dioxide nanoparticle sandwiched separator for  
Na-O<sub>2</sub> battery with suppressed dendrites and extending  
cycle life

*Hao Yang, Jianchao Sun, Hang Wang, Jing Liang\* and Haixia Li*

Key Laboratory of Advanced Energy Materials Chemistry (Ministry of Education)  
and Collaborative Innovation Center of Chemical Science and Engineering, College  
of Chemistry, Nankai University, Tianjin 300071, China

**\*Corresponding Author:** [liangjing@nankai.edu.cn](mailto:liangjing@nankai.edu.cn)

**This PDF file includes: Materials, Methods, Fig.S1 to S11 and Table S1 to S2.**

|    |                                                                                                 |           |
|----|-------------------------------------------------------------------------------------------------|-----------|
| 1  | <b>Table of contents</b>                                                                        |           |
| 2  | <b>Table S1 A summary of electrochemical performances of Na-O<sub>2</sub></b>                   |           |
| 3  | <b>batteries.....</b>                                                                           | <b>6</b>  |
| 4  | <b>Fig. S1 The first cycle of Na-Cu batteries with different separators.....</b>                | <b>7</b>  |
| 5  | <b>Fig. S2 XRD patterns of glass fiber before and after discharge-charge.....</b>               | <b>8</b>  |
| 6  | <b>Fig.S3 Optical photograph, SEM images and EDX elemental mapping images of</b>                |           |
| 7  | <b>the sodium dendrites in glass fiber.....</b>                                                 | <b>9</b>  |
| 8  | <b>Fig. S4 SEM images of glass fiber, PP and PVDF sandwiched</b>                                |           |
| 9  | <b>separator.....</b>                                                                           | <b>10</b> |
| 10 | <b>Fig. S5 Galvanostatic cycling of Na-Cu batteries.....</b>                                    | <b>11</b> |
| 11 | <b>Fig. S6 Optical photograph of pristine and sodiated PP-TiO<sub>2</sub>-PP separator.....</b> | <b>12</b> |
| 12 | <b>Fig. S7 Ti 2p XPS spectra of TiO<sub>2</sub> nanoparticles packed in separators.....</b>     | <b>13</b> |
| 13 | <b>Fig. S8 The line-scan during EDS analysis for the sodiated TiO<sub>2</sub></b>               |           |
| 14 | <b>nanoparticles..</b>                                                                          | <b>14</b> |
| 15 | <b>Fig. S9 Regions of sodiated TiO<sub>2</sub> selected for EDS spectroscopy.....</b>           | <b>15</b> |
| 16 | <b>Table S2 Atomic concentrations of Ti, O and Na determined by</b>                             |           |
| 17 | <b>EDS.....</b>                                                                                 | <b>16</b> |
| 18 | <b>Fig. S10 Coulombic efficiencies of Na-O<sub>2</sub> battery.....</b>                         | <b>17</b> |
| 19 | <b>Fig. S11 Discharge-charge curve of Na-O<sub>2</sub> battery.....</b>                         | <b>18</b> |

1

## 2 **Experimental section**

### 3 **Materials**

4 Titanium dioxide (TiO<sub>2</sub>, rutile) and silicon dioxide (SiO<sub>2</sub>) were supplied by Aladdin.  
5 The solvent, diethylene glycol dimethyl ether (DEGDME), was also purchased from  
6 Aladdin. Prior to use, it was treated to remove water by Na metal and reduced  
7 pressure distillation, and then stored with activated 4 Å molecular sieves (beads 8-  
8 12mesh, J&k) in glove box (H<sub>2</sub>O and O<sub>2</sub><0.1 ppm). NaSO<sub>3</sub>CF<sub>3</sub> (anhydrous, Aladdin)  
9 was dried under vacuum at 80 °C for 10 hours. The polypropylene (PP) separators are  
10 Celgard 2400, and specification of conductive carbon black is TIMCAL Super P li.

### 11 **Methods**

#### 12 **Preparation of sandwiched separators**

13 The PP-TiO<sub>2</sub>-PP sandwiched separator was prepared as followed. TiO<sub>2</sub>  
14 nanoparticles and polyvinylidene difluoride (PVDF) were dispersed in N-methyl-2-  
15 pyrrolidone (NMP) to make a slurry (mass ratio of TiO<sub>2</sub>:PVDF is 9:1). The slurry  
16 were coated on the side of the PP separator. And then the slurry coated separator was  
17 dried in a vacuum oven at 50 °C for 24 h. Finally, the two TiO<sub>2</sub> coated separators was  
18 pressed together. The other sandwiched separators with different fillers (SiO<sub>2</sub> or  
19 PVDF) were prepared using the same method.

#### 20 **Electrode fabrication**

21 The cathode of Super P on carbon paper without any binder was prepared using a  
22 spraying method. The slurry containing 35 mg Super P in 20 mL ethanol was obtained  
23 by sonicating for one hour. Then the uniform slurry was spraying onto one piece of  
24 carbon paper (10×10 cm<sup>2</sup>) with a power gas of high-pressure air at 100 °C. The

1 obtained carbon cathode was dried in a vacuum oven at 80°C overnight. The loading  
2 of Super P is 0.33 mg/cm<sup>2</sup>. The TiO<sub>2</sub> electrode was prepared by admixing TiO<sub>2</sub>  
3 nanoparticles, Super P and (PVDF) binder at a weight ratio of 6:3:1. The mixture was  
4 spread and pressed on a copper foil as working electrodes, and dried in vacuum at  
5 100°C for 12 h.

## 6 **Battery assembly**

7 Na-Cu batteries were assembled by using Na anode ( $\phi=10$  mm) and Cu cathode  
8 ( $\phi=10$  mm) with various separators respectively. Na-O<sub>2</sub> batteries were assembled  
9 using Na anode, different separators and Super P cathode. The above batteries are the  
10 coin-type CR-2032 cells and assembled in an argon-filled glove box. Especially, the  
11 cathode cases of Na-O<sub>2</sub> batteries were predrilled with seven homogenously distributed  
12 holes to allow the diffusion of O<sub>2</sub>, and the Na-O<sub>2</sub> batteries were put into an oxygen-  
13 filled glove box. Before electrochemical testing, all the batteries are rested for 10 h,  
14 and the electrolyte is 0.5M NaSO<sub>3</sub>CF<sub>3</sub> in DEGDME.

## 15 **Characterization**

16 X-Ray diffraction (XRD) analysis between 20-70° was performed on a Rigaku  
17 MiniFlex600 with Cu-K $\alpha$  radiation ( $\lambda = 1.54178$  Å) with a rate of 4°/min. The  
18 morphology and structure were observed by field-emission scanning electron  
19 microscopy (SEM, JEOL JSM7500F) and transmission electron microscopy (TEM,  
20 Philips Tecnai-F20). Raman spectroscopy was measured with a Thermo-Fisher  
21 Scientific (excitation wavelength, 532 nm). X-ray photoelectron (XPS) spectroscopy  
22 was measured in a Versa Probe PHI 5000 system (Al K $\alpha$  radiation of 1486.6 eV).

## 23 **Electrochemical testing**

24 Galvanostatic discharge/charge tests were measured on a LAND battery-test  
25 instrument (CT2001A). Electrochemical impedance spectra (EIS) were performed  
26 on a Parstat 2273A potentiostat/galvanostat workstation (AMETEK Company) in the

- 1 frequency of 100 mHz to 100 kHz. Cyclic voltammetry was conducted on a CHI660B
- 2 electrochemical workstation at a scan rate of 1 mV/s.

| Improved Content                   | Current Density           | Specific Capacity          | Electrode Loading        | Cycles | Ref.      |
|------------------------------------|---------------------------|----------------------------|--------------------------|--------|-----------|
| Cathodes: CaMnO <sub>3</sub> /C    | 200 mA g <sup>-1</sup>    | 1000 mA h g <sup>-1</sup>  | -                        | 80     | [1]       |
| Cathodes: N-doped carbon           | 200 mA g <sup>-1</sup>    | 500 mA h g <sup>-1</sup>   | 0.5 mg cm <sup>-2</sup>  | 66     | [2]       |
| Cathodes: B-doped carbon           | 3000 mA g <sup>-1</sup>   | 1000 mA h g <sup>-1</sup>  | 0.6 mg cm <sup>-2</sup>  | 125    | [3]       |
| Cathodes: N-doped graphene         | 100 mA g <sup>-1</sup>    | 500 mA h g <sup>-1</sup>   | 1 mg cm <sup>-2</sup>    | 100    | [4]       |
| Anode: Na@r-GO                     | 200 mA g <sup>-1</sup>    | 200 mA h g <sup>-1</sup>   | 0.6 mg cm <sup>-2</sup>  | 20     | [5]       |
| Anode: Sodiated carbon             | 20 mA g <sup>-1</sup>     | -                          | 9.7 mg cm <sup>-2</sup>  | 40     | [6]       |
| Concentrated Electrolyte           | 0.05 mA cm <sup>-2</sup>  | 0.15 mA h cm <sup>-2</sup> | -                        | 150    | [7]       |
| Separator: Nafion-Na <sup>+</sup>  | 0.16 mA cm <sup>-2</sup>  | 0.96 mA h cm <sup>-2</sup> | -                        | 118    | [8]       |
| Separator: PP-TiO <sub>2</sub> -PP | 200 mA g <sup>-1</sup>    | 1000 mA h g <sup>-1</sup>  | 0.33 mg cm <sup>-2</sup> | 137    | This work |
|                                    | 0.066 mA cm <sup>-2</sup> | 0.33 mA h cm <sup>-2</sup> |                          |        |           |

1 **Table S1** A summary of electrochemical performances of Na-O<sub>2</sub> batteries in recent  
2 years.

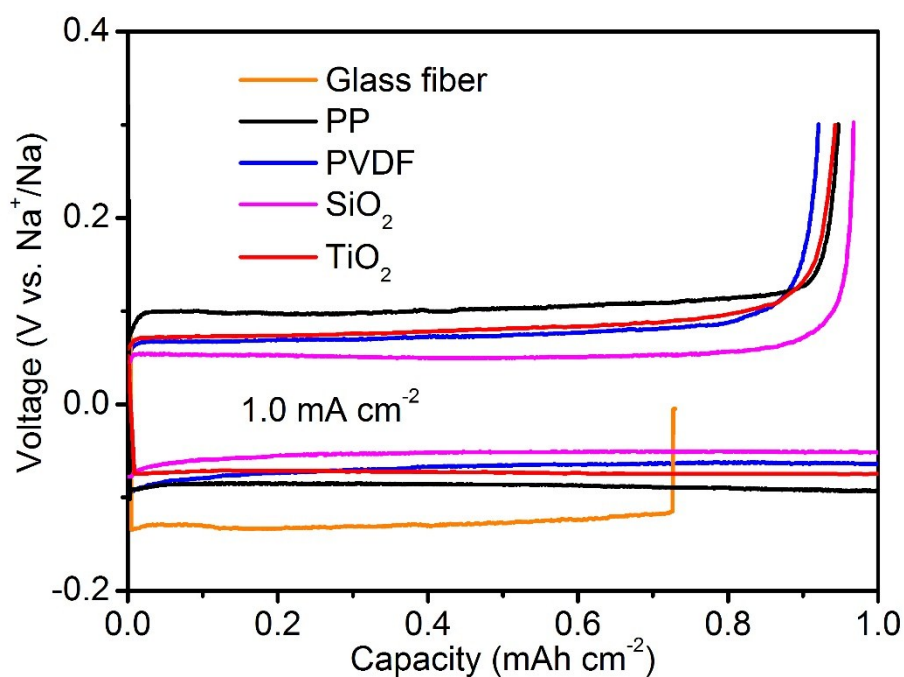

1

2 **Fig. S1** The first cycle of Na-Cu batteries with different separators at the current  
 3 density of  $1.0 \text{ mA cm}^{-2}$  for a specific capacity of  $1 \text{ mA h cm}^{-2}$ .

4 We used a program of 1 h of discharge followed by a compound procedure  
 5 controlling charge process (a time limit of 1 h or a voltage limit of 0.3 V). The  
 6 purpose of this setting is to prevent decomposition of electrolyte.

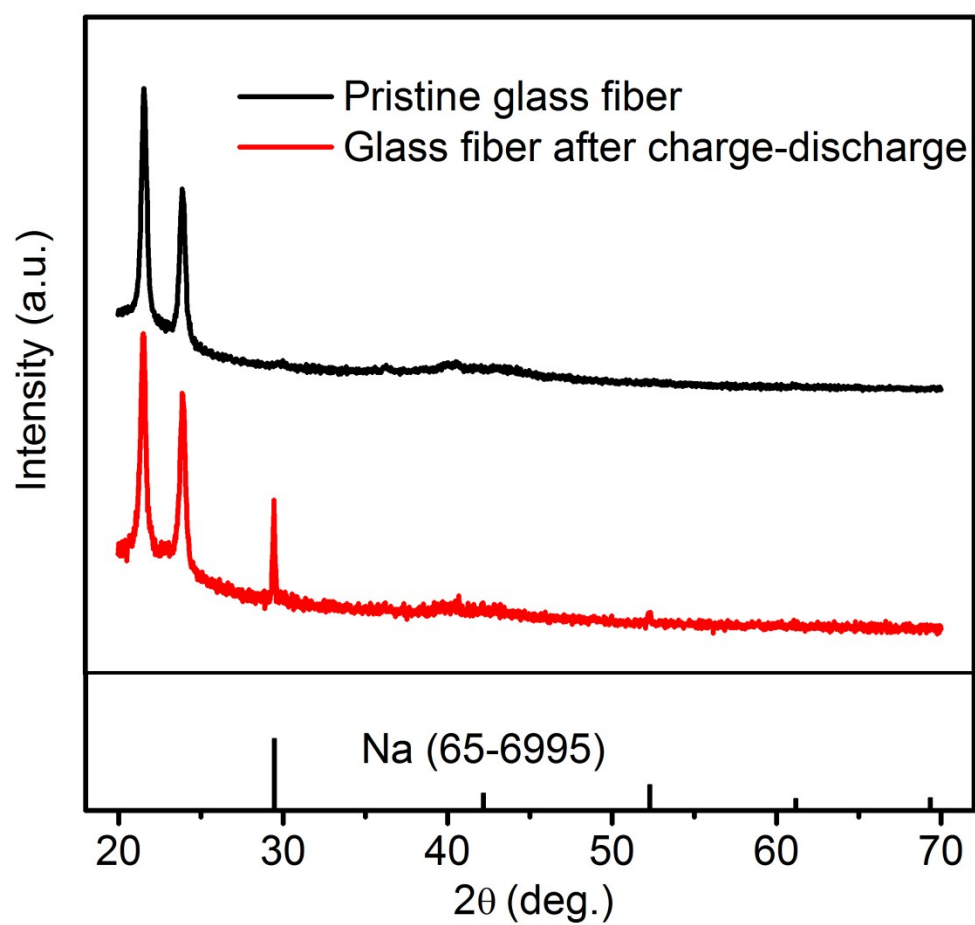

1

2 **Fig. S2** XRD patterns of glass fiber before and after discharge-charge.



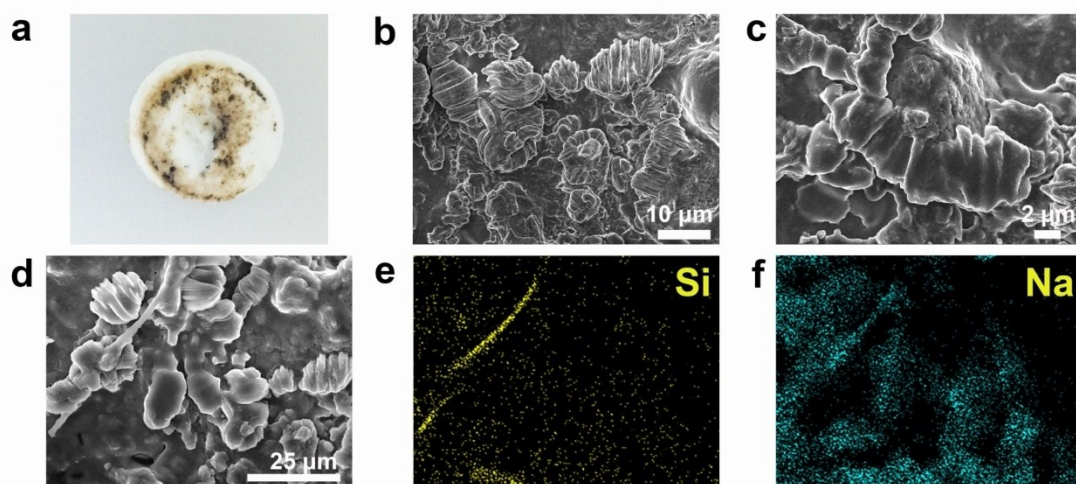

1  
2 **Fig. S3** (a) Optical photograph, (b-d) SEM images and (e, f) EDX elemental mapping  
3 images of the sodium dendrites in glass fiber.

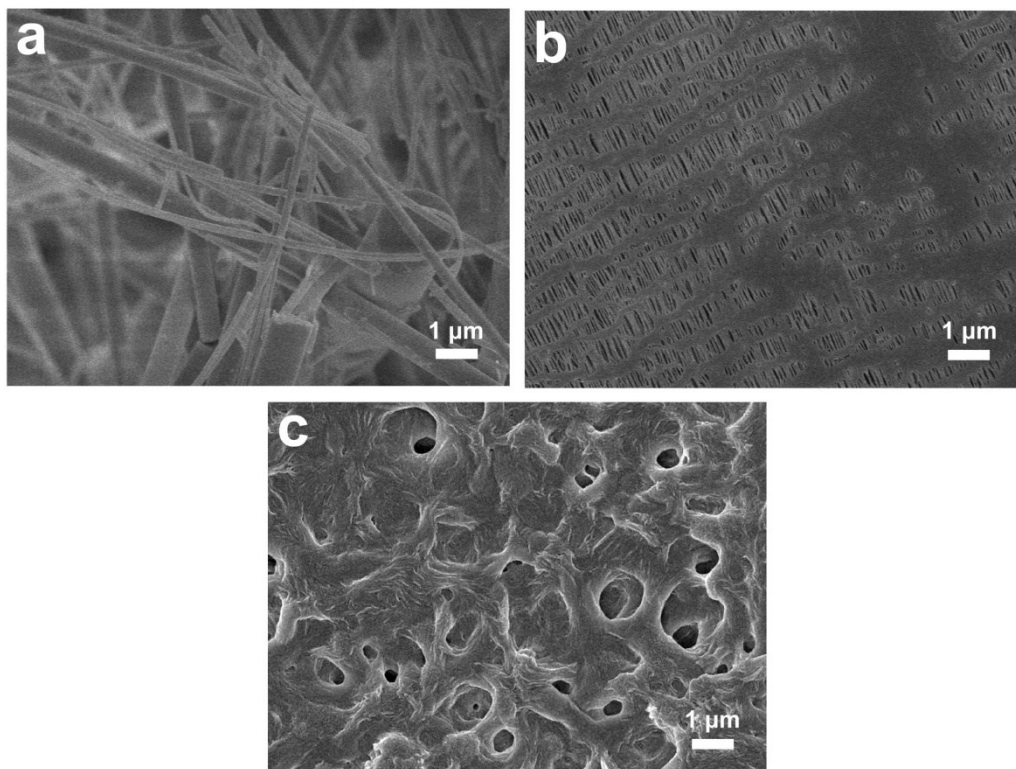

1  
2 **Fig. S4** (a-c) SEM images of glass fiber, PP and PVDF sandwiched separator  
3 respectively.

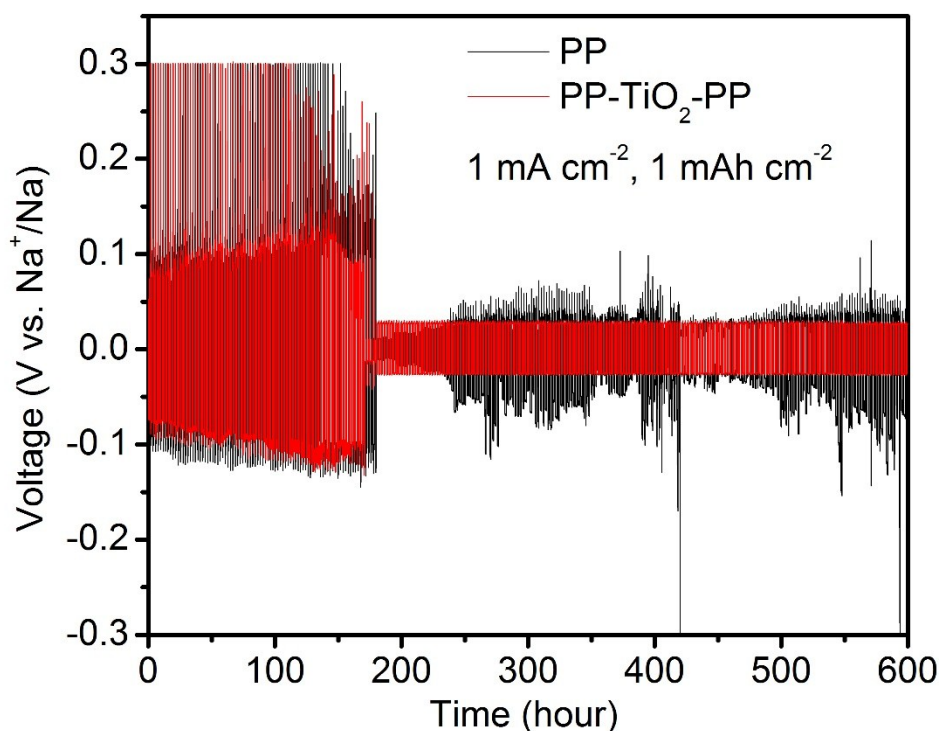

1

2 **Fig. S5** Galvanostatic cycling of sodium-copper batteries with PP separators or PP-  
 3 TiO<sub>2</sub>-PP separators. The current density was fixed at 1 mA cm<sup>-2</sup> with each cycle set to  
 4 2 h.

5 The first 180 hours shows normal discharge-charge cycle of Na-Cu batteries.  
 6 However, metallic sodium accumulated on the copper electrode because of limited  
 7 Coulombic efficiency, and then the batteries evolved into Na-Na batteries after  
 8 cycling 180 hours. According to the whole cycling curves, the battery with PP-TiO<sub>2</sub>-  
 9 PP separators shows better stability.

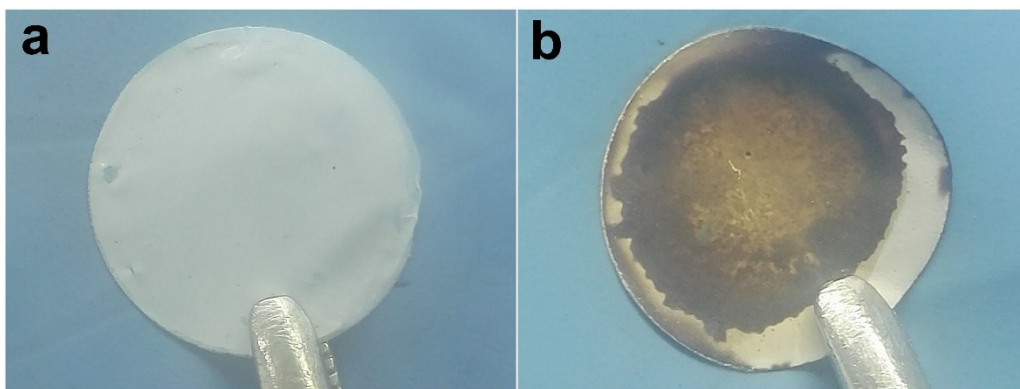

1

2 **Fig. S6** Optical photograph of (a) pristine and (b) sodiated PP-TiO<sub>2</sub>-PP separator.

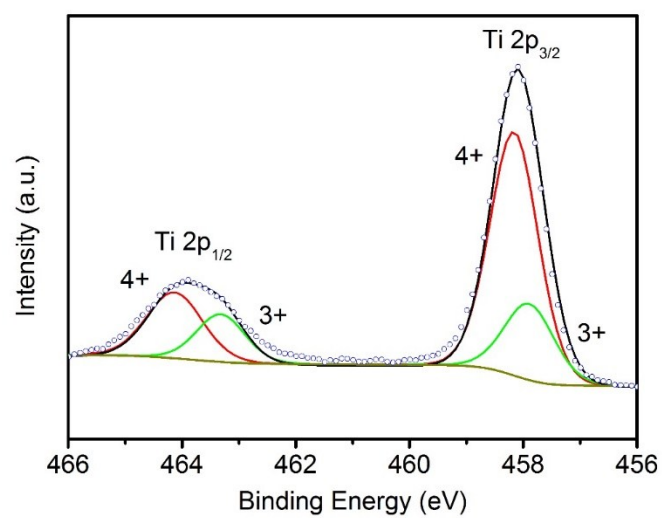

1

2 **Fig. S7** Ti 2p XPS spectra of TiO<sub>2</sub> nanoparticles packed in separators.

1

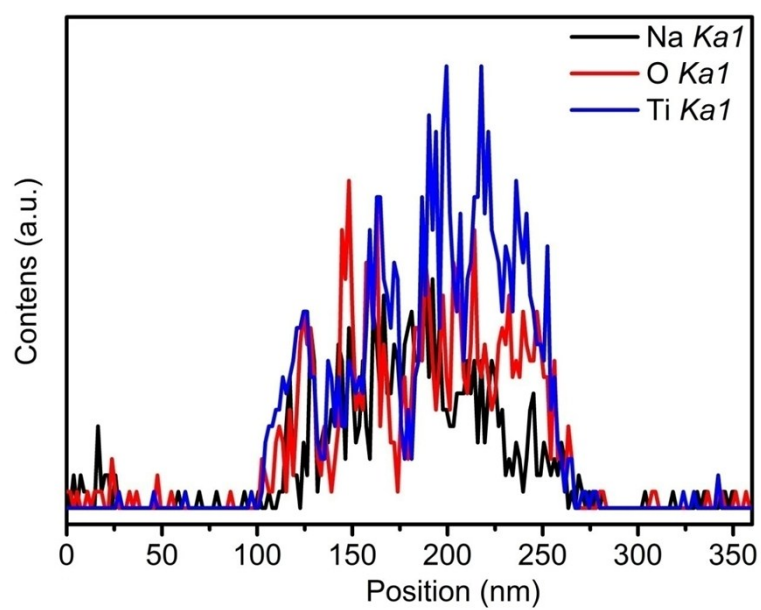

2

3 **Fig. S8** The line scan EDS analysis for the sodiated TiO<sub>2</sub> nanoparticles after cycles.

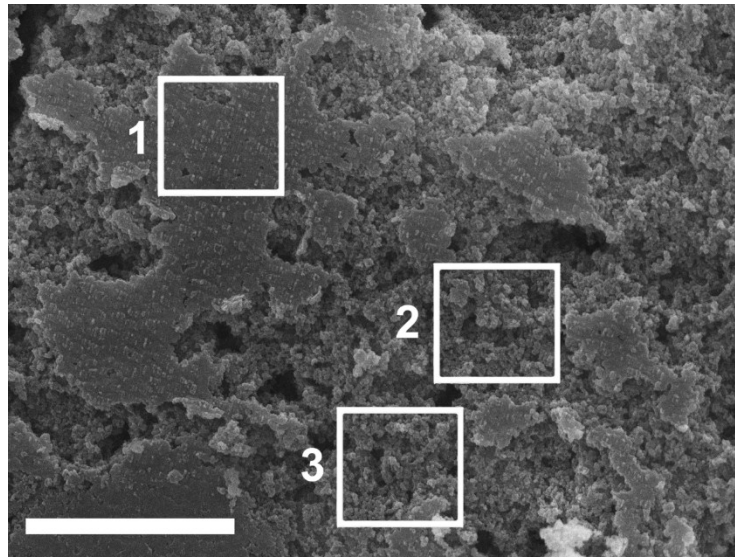

1

2 **Fig. S9** Regions of sodiated TiO<sub>2</sub> selected for EDS spectroscopy. The white scale bar  
3 is 5  $\mu\text{m}$ .

| Region  | Ti (At. %) | O (At. %) | Na (At. %) |
|---------|------------|-----------|------------|
| 1       | 25.91      | 62.50     | 11.59      |
| 2       | 26.98      | 65.48     | 7.55       |
| 3       | 31.56      | 60.35     | 8.09       |
| Average | 28.15      | 62.78     | 9.08       |

1 **Table S2** Atomic percent of Ti, O and Na determined by EDS on areas selected in the  
2 Fig. S9.



1

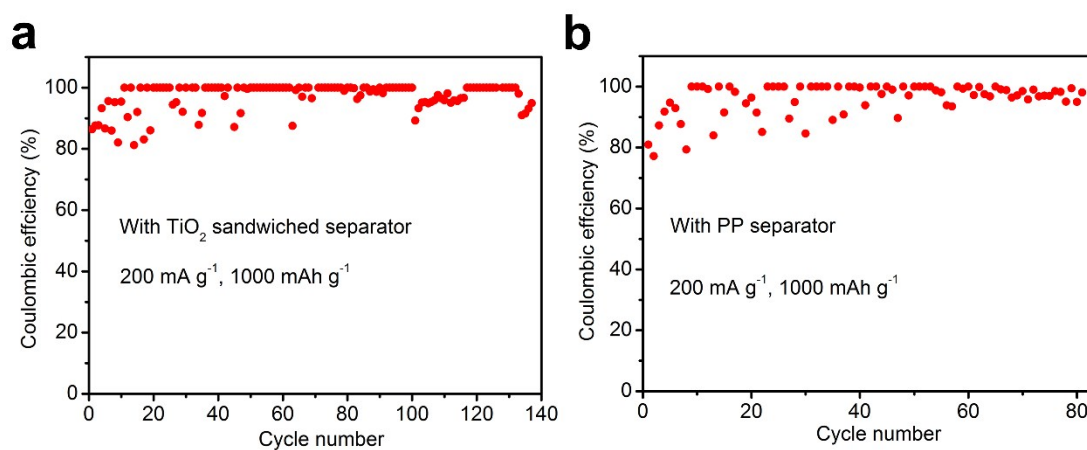

2

3 **Fig. S10** Coulombic efficiencies of Na- $\text{O}_2$  batteries with  $\text{TiO}_2$  nanoparticles  
4 sandwiched separator (a) and PP separator (b).

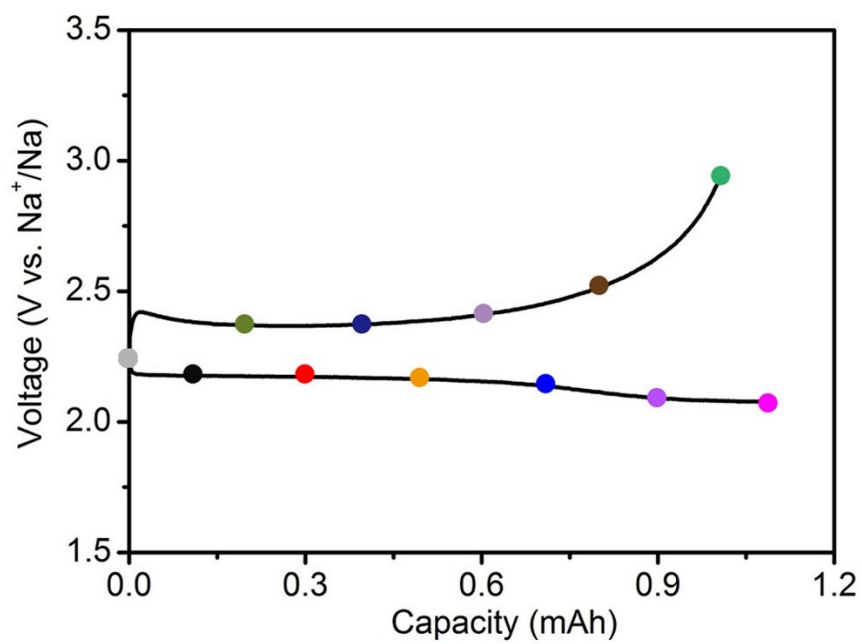

1

2 **Fig. S11** Discharge-charge curve of Na-O<sub>2</sub> battery.

## 1 References

- 2 [1] Y. Hu, X. Han, Q. Zhao, J. Du, F. Cheng and J. Chen, *J. Mater. Chem. A*, 2015, **3**,  
3 3320-3324.
- 4 [2] J. I. Ma and X.b. Zhang, *J Mater. Chem. A*, 2016, **4**, 10008-10013.
- 5 [3] C. Shu, Y. Lin, B. Zhang, S. B. Abd Hamid and D. Su, *J. Mater. Chem. A*, 2016, **4**,  
6 6610-6619.
- 7 [4] S. Zhang, Z. Wen, J. Jin, T. Zhang, J. Yang and C. Chen, *J. Mater. Chem. A*, 2016, **4**,  
8 7238-7244.
- 9 [5] A. Wang, X. Hu, H. Tang, C. Zhang, S. Liu, Y. W. Yang, Q. H. Yang and J. Luo,  
10 *Angew. Chem., Int. Ed.*, 2017, **56**, 11921-11926.
- 11 [6] C. L. Bender, B. Jache, P. Adelhelm and J. Janek, *J. Mater. Chem. A*, 2015, **3**,  
12 20633-20641.
- 13 [7] M. He, K. C. Lau, X. Ren, N. Xiao, W. D. McCulloch, L. A. Curtiss and Y. Wu,  
14 *Angew. Chem., Int. Ed.*, 2016, **55**, 15310-15314.
- 15 [8] X. Bi, X. Ren, Z. Huang, M. Yu, E. Kreidler and Y. Wu, *Chem. Commun.*, 2015, **51**,  
16 7665-7668.
